1 Modulation of antibiotic sensitivity and biofilm formation in *Pseudomonas*  
2 *aeruginosa* by interspecies diffusible signal factor analogues

3

4 Shi-qi An<sup>1\*</sup>, Julie Murtagh<sup>2</sup>, Kate B. Twomey<sup>2</sup>, Manoj K. Gupta<sup>3</sup>, Timothy P.  
5 O’Sullivan<sup>3,4</sup>, Rebecca Ingram<sup>1</sup>, Miguel A. Valvano<sup>1\*</sup>, Ji-liang Tang<sup>5\*</sup>

6

7 <sup>1</sup>The Wellcome-Wolfson Institute for Experimental Medicine, Queen’s University of  
8 Belfast, Belfast BT9 7BL, UK.

9 <sup>2</sup>School of Microbiology, Biosciences Institute, University College Cork, Cork,  
10 Ireland.

11 <sup>3</sup>School of Chemistry, University College Cork, Cork, Ireland.

12 <sup>4</sup>School of Pharmacy, University College Cork, Cork, Ireland.

13 <sup>5</sup>State Key Laboratory for Conservation and Utilization of Subtropical Agro-  
14 bioresources, The Key Laboratory of Ministry of Education for Microbial and Plant  
15 Genetic Engineering, and College of Life Science and Technology, Guangxi  
16 University, Guangxi 530004, China

17

18

19 \*Correspondence: s.an@qub.ac.uk (SA); m.valvano@qub.ac.uk (MAV);

20 jltang@gxu.edu.cn(JLT)

21

22

23 **RUNNING TITLE:** Interference with DSF-mediated interspecies signaling

24

25 **KEY WORDS:** Polybacterial infection, cell-cell signaling, chronic infection,  
26 antibiotic resistance

27

1 **ABSTRACT**

2 The opportunistic pathogen *Pseudomonas aeruginosa* can participate in inter-species  
3 communication through signaling by *cis*-2-unsaturated fatty acids of the diffusible  
4 signal factor (DSF) family. Sensing these signals involves the histidine kinase  
5 PA1396 and leads to altered biofilm formation and increased tolerance to various  
6 antibiotics. Here, we show that the membrane-associated sensory input domain of  
7 PA1396 has five trans-membrane helices, two of which are required for DSF sensing.  
8 DSF binding is associated with enhanced auto-phosphorylation of PA1396  
9 incorporated into liposomes. Further, we examined the ability of synthetic DSF  
10 analogues to modulate or inhibit PA1396 activity. Several of these analogues block  
11 the ability of DSF to trigger auto-phosphorylation and gene expression, whereas  
12 others act as inverse agonists reducing biofilm formation and antibiotic tolerance,  
13 both *in vitro* and in murine infection models. These analogues may thus represent lead  
14 compounds for novel adjuvants to improve the efficacy of existing antibiotics.

15  
16  
17  
18  
19  
20  
21  
22  
23  
24  
25  
26  
27  
28  
29  
30  
31  
32  
33

## 1 INTRODUCTION

2 Antibiotic resistance, coupled with limited development of new antibiotic agents,  
3 poses a significant global threat to public health, underscoring the need to find  
4 alternative strategies to fight infection<sup>(1, 2, 3)</sup>. These strategies include targeting the  
5 signaling pathways that regulate the synthesis of microbial virulence factors and  
6 approaches to improve the efficacy of existing antibiotics. Bacterial cell-cell  
7 communication (quorum sensing), biofilm formation and cyclic di-GMP signaling  
8 were proposed as potential targets for interference by small molecules<sup>(1-4)</sup>. Anti-  
9 virulence factors are attractive since they do not influence bacterial growth, which  
10 may reduce the selective pressure for developing resistance.

11

12 This study addresses the modulation of *Pseudomonas aeruginosa* by inter-species  
13 signaling. *P. aeruginosa*, a widespread opportunistic human pathogen, uses two *N*-  
14 acyl homoserine lactones (3-oxo-dodecanoyl- and butanoyl-HSL) as well as the  
15 quinolone signal PQS (2-heptyl-3-hydroxy-4(1*H*)-quinolone) as quorum sensing  
16 molecules that regulate the synthesis of many virulence factors<sup>(5-8)</sup>. There are various  
17 reports of small molecule inhibition of these pathways, with consequent effects on  
18 virulence factor synthesis<sup>(4, 9-13)</sup>. In addition to intra-species signaling, *P. aeruginosa*  
19 can participate in inter-species signaling mediated by molecules of the diffusible  
20 signal factor (DSF) family, which are *cis*-2-unsaturated fatty acids. In particular, *P.*  
21 *aeruginosa* senses *cis*-11-methyl-2-dodecenoic acid (DSF) and *cis*-2-dodecenoic acid  
22 (BDSF), which are produced by other bacteria such as *Burkholderia* species and  
23 *Stenotrophomonas maltophilia* but not by *P. aeruginosa*<sup>(14, 15)</sup>. Sensing occurs  
24 through a histidine kinase PA1396 and leads to altered biofilm formation and  
25 increased tolerance to several antibiotics including polymyxin B<sup>(14, 16)</sup>. Mutation of  
26 *PA1396* in the model strain PAO1 and several clinical isolates also leads to increased  
27 tolerance to polymyxins B and E, suggesting DSF negatively modulates PA1396  
28 activity<sup>(14, 16)</sup>. Detection of DSF family molecules in polybacterial infections, such as  
29 those associated with cystic fibrosis (CF) where *P. aeruginosa* is present together  
30 with other bacterial species, suggests interspecies signaling occurs *in vivo* and may  
31 therefore lead to reduced efficacy of antibiotic therapy<sup>(14, 16)</sup>.

32

33 Here, we examine in more detail the role of PA1396 in sensing DSF family signals  
34 and the potential of structural analogues of these signals to modulate PA1396 action.

1 In particular, we focus on the effects of DSF analogues on the PA1396-regulated  
2 functions of biofilm formation and antibiotic tolerance, both *in vitro* and in murine  
3 infection models. We demonstrate that only two of the five trans-membrane helices of  
4 the input domain of PA1396 are required for DSF sensing, and DSF binding is  
5 associated with enhanced PA1396 auto-phosphorylation. Furthermore, we found that  
6 certain analogues of DSF block its ability to trigger auto-phosphorylation, which  
7 coincide with specific alterations in the expression of a subset of *P. aeruginosa* genes,  
8 reduction in biofilm formation and antibiotic tolerance using both *in vitro* and *in vivo*  
9 infection models. Together, our findings indicate DSF-mediated interspecies  
10 interactions may be influenced pharmacologically to improve the treatment of chronic  
11 *P. aeruginosa* infections.

12

## 13 **RESULTS**

### 14 **Examining the sensor input domain of PA1396 for DSF recognition**

15 Although DSF perception by PA1396 requires its membrane-associated sensor input  
16 domain<sup>(14)</sup>, the underlying molecular mechanism is unknown. As a first step to better  
17 understand DSF sensing by PA1396, topological models of the protein were generated  
18 with various prediction programs. Analyses with TMHMM, MEMSAT, SOSUI, and  
19 HMMTOP suggested a topological model for PA1396 comprising five  
20 transmembrane helices (TMHs), and with the N- and the C-terminus located in the  
21 periplasm and cytoplasm, respectively (Fig. 1a). In contrast, TOPPRED predicted a  
22 relatively large cytosolic loop and a different location in the protein for some of the  
23 TMHs. To experimentally assess the PA1396 topology, we constructed translational  
24 fusions expressing hybrid proteins of the PA1396 input domain with either alkaline  
25 phosphatase (PhoA) or  $\beta$ -galactosidase (LacZ) reporters as topological probes for  
26 periplasmic and cytoplasmic locations, respectively. The hybrid proteins were  
27 designed such that at least one fusion was placed in each predicted loop facing either  
28 the periplasm or the cytoplasm (Fig. 1b).

29

30 Plasmids carrying hybrid constructs were mobilized into *E. coli* and tested for PhoA  
31 and LacZ activity in solid growth medium containing the substrates for either PhoA  
32 (X-Phos) or LacZ (X-Gal), which permitted the visual estimation of the enzyme  
33 activity of PA1396-PhoA and PA1396-LacZ fusion proteins, respectively. *E. coli*  
34 expressing PhoA fusions to PA1396 at amino acid residues E4, N6, G66, A70, A137,

1 Q139 and Q141 exhibited clear PhoA<sup>+</sup> phenotypes (blue colonies), whereas PhoA  
2 fusions to PA1396 at amino acid residues V37, E38, G107, G109 and L205 gave rise  
3 to PhoA<sup>-</sup> phenotypes (white colonies). Conversely, bacteria expressing LacZ fusions  
4 to PA1396 at amino acid residues V37, E38, G107, G109, L205, T240, L300 and  
5 L381 exhibited LacZ<sup>+</sup> phenotypes (blue colonies). In contrast, LacZ fusions to  
6 PA1396 at amino acid residues E4, N6, G66, A70, A137, Q139 and Q141 resulted in  
7 LacZ<sup>-</sup> phenotypes (white colonies). These findings, also confirmed by quantitative  
8 assays (Supplementary Table 1), fit with a model of a five-TMHs protein and the  
9 topology shown in Fig. 1b.

10

11 To test whether the predicted TMHs are important for DSF sensing, we constructed  
12 PA1396 derivatives with progressive truncations at the N-terminus. Each truncated  
13 *PA1396* gene was cloned into pBBR1MCS and the constructs introduced into a  
14 *PA1396* deletion mutant. Bacteria expressing each of these transconjugants were  
15 examined for their ability to respond to exogenous DSF by measuring *pmrAB* gene  
16 expression using a *pmr-gfp* fusion, and for polymyxin B resistance (see Methods for  
17 details). Removal of the first three TMHs did not affect the ability of PA1396 to  
18 respond to DSF when compared to wild-type (Fig. 1c). In contrast, any further  
19 truncation led to a loss of DSF responsiveness (Fig. 1c). Western blot analysis with  
20 antisera against the His<sub>6</sub> tag showed that all of the truncated proteins were expressed  
21 to the same level as the wild type (Supplementary Fig. 1). These results suggested  
22 TMHs IV and V have a role in DSF sensing by PA1396.

23

24 To identify specific residues important for DSF binding and signal transduction, we  
25 first focused on those conserved in PA1396 homologues from different bacterial  
26 species. Conserved or semi-conserved residues in TMHs IV and V (Supplementary  
27 Fig. 2) were examined for functionality by constructing alanine replacements (or  
28 serine in the case of alanine residues). Residues Y116, L117, T121, L123, L128, T135,  
29 P136, W138, A140, P142, M144, L148, M149, V154, I155, P156 and Y158 were  
30 replaced and the resulting variants assayed for their ability to confer response to DSF.  
31 Bacteria expressing many of the variants did not exhibit significant changes in DSF  
32 responsiveness. We identified a number of variants exhibiting decreased sensitivity to  
33 DSF, such that higher concentrations were required to activate the *pmr-gfp* reporter  
34 although significant activation occurred at concentrations in excess of 50 μM. These

1 variants had alanine replacements at T121, L123, L128, P142, L148, M149, V154 and  
2 I155. Except for P142, all the variants with reduced DSF sensitivity were altered in  
3 positions within the last two TMHs of PA1396. Variants with combinations of alanine  
4 substitutions (such as T121A/L123A/ L128A) had an even further reduced sensitivity  
5 (Fig. 1d). The observed differences in the responses to DSF by the reporter strain  
6 could not be attributed to differential protein expression since all replacements were  
7 expressed to the same level as the parental protein (Supplementary Fig. 1). Together,  
8 we conclude residues in TMH-IV and TMH-V of PA1396 play a critical role in the  
9 recognition of the DSF signal.

10

### 11 **Physiochemical features of DSF important for recognition by PA1396**

12 The DSF family comprises *cis*-2-unsaturated fatty acids of differing chain length,  
13 methyl substitution and saturation<sup>(15)</sup>. Individual bacteria can produce multiple DSF  
14 family signals, although often a single chemical species predominates. Previous work  
15 showed that the configurational isomer *trans*-11-methyl-2-dodecenoic acid was 500-  
16 fold less effective than DSF in activation of *pmrAB*, whereas the corresponding  
17 unsaturated fatty acids have little or no activity<sup>(14)</sup>. To examine the structural features  
18 of the DSF signals important for PA1396 sensing in more detail, we synthesized a  
19 panel of analogs differing from the DSF ‘parent’ molecule in chain length, position  
20 and presence of methyl branching or with a *trans* configuration of the double bond.  
21 Additional molecules were created by esterification, conversion to hydroxamic acids  
22 or amides, and by incorporation of stable aromatic substituents to replace the  
23 carboxylic acid moieties (see Fig. 2a). This library of structural derivatives provided a  
24 platform to define key structural features important for PA1396 sensing and signal  
25 transduction activity.

26

27 The activity of the molecules in this panel was assayed by determining the relative  
28 fluorescence of the reporter normalized by bacterial cell density (Fig. 2b). Because the  
29 minimum concentration of DSF (*cis*-11-methyl-2-dodecenoic acid) for significant  
30 induction of *pmr-gfp* expression was 0.01  $\mu$ M, the 27 DSF derivatives were examined  
31 at this concentration. The results revealed that all fatty acids with a *trans*  
32 configuration of the double bond at the 2-position render the molecule inactive (Fig.  
33 2b), consistent with previous reports indicating this configuration is critical for DSF  
34 activity<sup>(16-18)</sup>. However, the presence or the position of the methyl group at C-11 in

1 DSF was not essential for activity. Indeed, *cis*-2-tridecenoic acid (C9) and *cis*-2-  
2 dodecenoic acid (C2, BDSF) without the methyl substitution, as well as *cis*-7-methyl-  
3 2-dodecenoic acid (C6) and *cis*-8-methyl-2-dodecenoic acid (C5) where the methyl  
4 group was transposed to the C-7 and C-8 positions, were equally effective in the  
5 bioassay. In contrast, the fatty acid chain length played a major role in determining  
6 bioactivity. *cis*-2-Unsaturated fatty acids with chain lengths of 12-14 carbons were  
7 active whereas those with longer chains were not (Fig. 2b). The introduction of a  
8 second double bond in the chain also led to reduced activity, while derivatives in  
9 which the carboxylic acid was esterified, converted to a hydroxamic acid or amide  
10 derivative or replaced with a 2-amino pyridine moiety were all inactive. For each of  
11 these derivatives, no activity was seen in the concentration range from 0.01 to 1000  
12  $\mu$ M. Interestingly, *cis*-2-tetradecenoic acid (C11), which is a naturally occurring  
13 analogue first detected in *Xylella fastidiosa*<sup>(17)</sup>, was most effective in activating the  
14 bioassay (Fig. 2c). Strains carrying the T121A/L123A/ L128A replacement mutants  
15 of PA1396 showed similar reduced responsiveness to both C11 and DSF (Fig. 2c).

16

### 17 **DSF analogues interfere with DSF signaling in *P. aeruginosa***

18 The structural analogues unable to trigger DSF-dependent responses were assessed for  
19 inhibitory activity against DSF signaling. For these experiments, the molecules were  
20 screened at 10  $\mu$ M using *P. aeruginosa* grown with 50  $\mu$ M DSF. Several compounds,  
21 especially C12, C23 and C24 effectively repressed *pmr-gfp* expression (Fig. 3a),  
22 possibly acting as PA1396 receptor antagonists. None of the compounds affected  
23 planktonic bacterial growth (Supplementary Fig. 3). Dose response assays of each of  
24 the three compounds revealed that compound 23 ((*Z*)-11-methyl-*N*-  
25 (methylsulfonyl)dodec-2-enamide; C23) was the most potent DSF antagonist showing  
26 substantial inhibition at 0.1  $\mu$ M (Fig. 3b).

27

28 To examine if these compounds interfere directly with signal transduction through  
29 PA1396, we assessed the effects of DSF and the putative antagonists on PA1396 auto-  
30 phosphorylation. For these experiments, MycHis-tagged PA1396 was expressed,  
31 purified under native conditions, and reconstituted in liposomes where the protein  
32 adopts an inside-out orientation in which the cytoplasmic histidine acceptor, histidine  
33 kinase and receiver domains are surface exposed. The incorporation of PA1396 into  
34 liposomes was confirmed by Western blot using anti-Myc antibody, whereas the



1 inside-out orientation can be surmised from the accessibility of ATP to the kinase site,  
2 which allows auto-phosphorylation without disruption of the liposomes. Basal auto-  
3 phosphorylation of PA1396 in the liposomes was seen in the absence of any signal  
4 molecule (Fig. 3c, Supplementary Table 2). However, the addition of DSF to  
5 PA1396-loaded liposomes increased the level of auto-phosphorylation dramatically,  
6 an effect not seen in the presence of C23 (Fig. 3c, Supplementary Table 2). These  
7 findings suggest C23 blocks the recognition of DSF by PA1396, which normally  
8 mediates increased kinase activity. The observation that the T121A/L123A/L128A  
9 mutant protein had a similar level of basal auto-phosphorylation as the parental  
10 PA1396, which could not increase upon addition of DSF, also supports this  
11 conclusion (Fig. 3c, Supplementary Table 2). Further, the latter result agrees with the  
12 observation that T121A/L123A/L128A has a substantially reduced response to DSF *in*  
13 *vivo* as measured by the *pmr-gfp* reporter bioassay (Fig. 1d).

14  
15 We previously found that DSF alters the expression levels of *P. aeruginosa* genes  
16 implicated in virulence, biofilm formation and stress tolerance<sup>(14)</sup>. In this study, we  
17 assessed the effect of C23 on DSF-regulated functions by qRT-PCR using a subset of  
18 11 DSF-regulated genes. These included genes involved in iron uptake (*PA4358*,  
19 *PA4359*) and antibiotic resistance (*PA4599*, *PA4774–PA4777*). For these experiments,  
20 *P. aeruginosa* was grown in artificial CF sputum medium with and without DSF  
21 supplementation, and with both DSF and C23. Cultures were assayed at early log  
22 phase (OD<sub>600</sub> of 0.6). For several of the genes tested, the addition of C23 in the  
23 growth medium reduced the level of expression seen with DSF alone and in some  
24 cases (e.g. *PA2966*, *PA5505*) the effects on expression were reversed (Fig. 3d). These  
25 experiments were repeated with the *PA1396* mutant strain, demonstrating that the  
26 addition of DSF or C23 had no effect on the level of gene expression (Supplementary  
27 Fig. 4). Together, the results from *in vitro* auto-phosphorylation experiments and  
28 transcriptional profiling of a subset of PA1396-regulated genes indicate C23 interferes  
29 with the PA1396 ability to sense DSF.

30

### 31 **Interference with DSF sensing decreases biofilm formation and alters virulence** 32 **of *P. aeruginosa* *in vivo***

33 DSF stimulates the development of *Pseudomonas aeruginosa* biofilms *in vitro* and  
34 promotes persistent infection *in vivo*<sup>(14, 16, 18)</sup>. We examined if C23 interferes with



1 biofilm formation using a co-culture system in which *P. aeruginosa* biofilms were  
2 allowed to form on human lung epithelial cells upon addition of 1  $\mu\text{M}$  DSF<sup>(16)</sup>. C23 at  
3 concentrations as low as 0.5  $\mu\text{M}$  C23 led to reduced biofilm formation in the presence  
4 of DSF (Fig. 4a). Intriguingly, addition of C23 alone caused a reduction of biofilm  
5 development (Fig. 4a). In contrast, the *PA1396* mutant formed more biofilm than the  
6 parental strain, but biofilm formation was not significantly altered by either DSF or  
7 C23 (Supplementary Fig. 5a). Biofilm formation on a glass surface was also assayed  
8 by crystal violet staining. Similar effects of DSF and C23 on biofilm biomass as in the  
9 co-culture experiments were observed (Fig. 4b) including the ability of C23 alone to  
10 inhibit biofilm formation. These effects were not seen in experiments using the  
11 *PA1396* mutant strain (Supplementary Fig. 5b).

12  
13 To determine whether C23 modulates bacterial behavior during infections, C57BL/6  
14 mice were inoculated intranasally with suspensions of *P. aeruginosa* supplemented  
15 with C23, DSF or C23 with DSF. As a control, bacterial inocula were suspended in  
16 PBS alone. At 24 h post infection, the *P. aeruginosa* PAO1 bacterial load was quite  
17 considerable in the control animals. However, in the presence of C23, the number of  
18 bacteria was considerably reduced. With DSF alone, higher numbers of bacteria were  
19 seen after 24 h than in the control (Fig. 4c), in agreement with previous trends seen in  
20 other *in vivo* models<sup>(16)</sup>. With C23 in combination with DSF, the bacterial load was  
21 reduced when compared to DSF alone (Fig. 4c). Thus, C23 reduced the bacterial load  
22 in this mouse model in the presence or absence of DSF.

23  
24 To verify that C23 functions by inhibiting DSF signaling *in vivo*, we used microarray  
25 to compare the effects of adding either DSF alone or DSF with C23 on *P. aeruginosa*  
26 gene expression during mouse lung infection relative to the gene expression of *P.*  
27 *aeruginosa* in the mouse lung with no compound. RNA was derived from organisms  
28 isolated directly from the lung homogenates of infected mice. The results showed that  
29 the expression of 68 genes was significantly altered ( $> 1.25$ -fold,  $P_{\text{adj}} < 1 \times 10^{-5}$ ) by  
30 the addition of DSF (Fig. 4d; Supplementary Table 3). While many of these  
31 differentially expressed genes were originally annotated as hypothetical proteins,  
32 several encode factors required by *P. aeruginosa* for growth and/or host colonization  
33 of the host; these genes included *norB* (*PA0524*), *popD* (*PA1709*), *sphA* (*PA2659*)  
34 and *narK* (*PA3876*). Additional regulated genes encoded factors that contribute to *P.*

1 *aeruginosa* virulence and biofilm formation such as the *mexC* (PA4599), *pmr* operon  
2 (PA4774, PA4776, PA4777) and *exoS* (PA3841).

3

4 Addition of DSF and C23 significantly altered expression of 51 genes (Fig. 4d).  
5 Comparison with the effects of DSF alone showed expression changes in 21 genes  
6 occurred in both treatments (DSF vs DSF plus C23) with all 21 of these genes altered  
7 in the same direction. The expression level (fold change in expression) of these genes  
8 was reduced in DSF plus C23 treatment when compared with the DSF treatment alone  
9 (Supplementary Table 3). Further, some genes significantly regulated by DSF showed  
10 no significant alteration in the presence of DSF and C23. Examples of this group of  
11 genes include *popD* (PA1709) and *pmr* operon genes (PA4774, PA4776, PA4777).  
12 Also, various genes showed a significant alteration in expression in response to DSF  
13 plus C23, but not to DSF alone (Fig. 4d, 4e). Selected genes were examined using  
14 qRT-PCR to confirm the alteration in expression as revealed by the microarray (Fig.  
15 4e). Together, the combined results of the experiments described above show that C23  
16 is not only able to inhibit DSF-activated responses *in vitro* and *in vivo*, but also has a  
17 broader effect on gene expression independent of DSF-regulated responses.

18

19 The effect of C23 alone on gene expression was examined in a separate experiment on  
20 bacteria grown in artificial sputum medium in the presence or absence of the  
21 compound at 50  $\mu$ M. RNA was extracted from these cultures and the level of  
22 expression of selected genes examined by qRT-PCR. Of the genes examined, *gcdH*  
23 (PA0447) and *murA* (PA4450) appeared to have elevated expression as a response of  
24 C23 addition to *P. aeruginosa* PAO1, but showed little or no response to DSF  
25 (Supplementary Fig. 6).

26

### 27 **The DSF analogue C23 improves antibiotic efficacy**

28 Perception of DSF by *P. aeruginosa* mediated by PA1396 leads to increased  
29 expression of the *pmrAB* operon and the concomitant increased level of resistance to  
30 the cationic antimicrobial peptides polymyxin B and E<sup>(14, 16)</sup>. Further, DSF increases  
31 tolerance to polymyxin B in *P. aeruginosa* biofilms-airway epithelial cells co-  
32 cultures<sup>(16)</sup>. These observations prompted us to examine the influence of C23 on the  
33 sensitivity of *P. aeruginosa* to antibiotics. As expected, addition of DSF led to *pmrAB*  
34 up-regulation and an increased resistance to polymyxin B (Fig. 5a, b). By contrast,

1 addition of C23 plus DSF led to a marked reduction in *pmrAB* expression and reduced  
2 resistance to polymyxin B. Although the *pmrAB* expression level in response to C23  
3 alone was close to wild-type, C23 did appear to slightly enhance the activity of  
4 polymyxin B against PAO1 (Fig. 5a). We also examined the influence of DSF and  
5 C23 singly and in combination in resistance to other classes of antibiotics used in  
6 treatment of *P. aeruginosa*. Addition of DSF to the cultures led to increased resistance  
7 to tobramycin and nalidixic acid but had no effect on carbapenem resistance. The  
8 effect of DSF on increased tobramycin and nalidixic acid resistance was reversed by  
9 C23 (Supplementary Fig. 7).

10

11 To validate these results in other strains, we examined a panel of *P. aeruginosa*  
12 clinical isolates and the data revealed that addition of DSF led to a significant increase  
13 in the expression of *pmrAB* in each of these strains (Fig. 5b). However, addition of  
14 C23 reversed this DSF-induced effect in all strains, whereas C23 alone gave only  
15 modest or no increase in expression. In all of these cases, changes in *pmrAB*  
16 expression were associated with a concomitant alteration in resistance to polymyxin  
17 B, as seen with PAO1 (Supplementary Fig. 7). Further, addition of C23 also reversed  
18 DSF-induced tobramycin tolerance in the clinical isolates, which decreased in all  
19 strains (Supplementary Fig. 8). The *PA1396* mutant in PAO1 showed increased  
20 resistance to polymyxin B, an effect that could not be reversed by addition of C23, as  
21 expected. To determine whether PA1396 was also required for the response of clinical  
22 isolates of *P. aeruginosa* to C23, we created *PA1396* gene disruption mutants in five  
23 of them, which were selected because of their intrinsically higher level of *pmrAB*  
24 expression and polymyxin resistance. None of the mutant strains responded to C23,  
25 confirming the C23 antagonist effect on DSF is mediated by PA1396 (Supplementary  
26 Fig. 9).

27

28 We also assessed the effect of C23 on the efficacy of tobramycin treatment in the  
29 C57BL/6 mouse lung infection model. Mice were infected with  $1 \times 10^7$  CFU of PAO1  
30 and treated by inhaling PBS with or without C23. Tobramycin was administered at a  
31 concentration of 30 mg/kg one hour after infection, as previously reported<sup>(19, 20)</sup>. The  
32 lung bacterial load was determined 24 h post-infection. Control mice infected with *P.*  
33 *aeruginosa* and inhaled PBS exhibited considerable colonization (Fig. 5c), which was  
34 reduced by tobramycin treatment. However, adding C23 with tobramycin resulted in a

1 larger decrease of the bacterial load than that seen with tobramycin alone (Fig. 5c).  
2 The kinetics of clearance of the *PA1396* mutant strain from mice not treated with  
3 antibiotics was similar to that of mice infected with PAO1. Together, these results  
4 demonstrate that C23 treatment leads to reduced resistance of *P. aeruginosa*  
5 laboratory and clinical strains to distinct antibiotics both *in vitro* and *in vivo* during  
6 infection, an effect manifested through a functional PA1396 sensor kinase.

7

## 8 **DISCUSSION**

9 This study provides a detailed characterization of the membrane topology of PA1396  
10 including the identification of its input domain, which has considerable sequence  
11 similarity with the input domain of RpfC, the sensor histidine kinase for DSF-  
12 mediated cell-to-cell signalling in *Xanthomonas campestris* pv. *campestris* <sup>(15, 23)</sup>.  
13 However, significant differences between PA1396 and RpfC also exist. RpfC contains  
14 a short N-terminal periplasmic region implicated in DSF binding<sup>(24)</sup>, suggesting DSF  
15 is captured in the periplasmic space. Residue E19, which is conserved in all  
16 homologues with the RpfC-related input domain, is among various key residues for  
17 DSF binding in RpfC<sup>(14, 24)</sup>. In *P. aeruginosa* PA1396, the corresponding residue is E8,  
18 also in the N-terminal periplasmic region. However, deletion of a significant part of  
19 the N-terminal region of PA1396 has no effect on DSF sensing by *P. aeruginosa*.  
20 Unlike RpfC, our results indicate the DSF binding capability of PA1396 requires  
21 residues in TMHs IV and V. This suggests that DSF likely interacts with residues in  
22 these TMHs at the membrane level.

23

24 The PA1396 recognition of DSF shares features with the CqsS system of *Vibrio*  
25 *cholerae*, which is responsible for detection of the quorum-sensing signal CAI-1 (*S*-3-  
26 hydroxytridecanone). Both CqsS and PA1396 have complex membrane spanning  
27 domains with multiple TMHs and periplasmic and cytoplasmic loops of limited size  
28 and both recognise ligands with alkyl chains of medium length and an amphipathic  
29 nature. Nevertheless, substantial differences between the systems occur. In CqsS,  
30 conserved residues in the first three (of six) TMHs are obligatory for CAI-1 ligand  
31 binding and subsequent signal transduction. Further, residues in the fourth  
32 transmembrane helix enable CqsS to discriminate between CAI-1 and amino-CAI-1  
33 and residues in the fifth TMH has roles in restricting ligand head group size and tail  
34 length<sup>(25)</sup>. In contrast, PA1396 truncation experiments suggest that the first three

1 TMHs of the protein are dispensable for DSF perception. However, whether THMs I-  
2 III of PA1396 have roles in detection of other ligands is unknown.

3

4 Previous work on interspecies signaling in *P. aeruginosa* demonstrated that the *cis*-2-  
5 unsaturated fatty acids DSF and BDSF trigger *pmr* gene expression, but weak or no  
6 activity was observed with the *trans*-derivatives and related saturated fatty acids. Here  
7 we confirm and extend the analysis of structural requirements for interspecies  
8 signaling. All *trans*-unsaturated fatty derivatives, irrespective of chain length, had  
9 little or no signaling activity on *pmr* gene expression. Similarly, any derivative  
10 lacking a free carboxylic acid group (through esterification, conversion to a  
11 hydroxamic acid or substitution with a 2-amino pyridine moiety) was inactive. The  
12 signaling activity was not significantly affected by the position of the methyl group  
13 (at position 11 in DSF) but was partially reduced by introducing a second double bond.  
14 Notably, a derivative of DSF with a second double bond (*cis*, *cis*-11-methyldodeca-  
15 2,5-dienoic acid) occurs naturally in various *Xanthomonas* species, but also has a  
16 reduced ability compared to DSF to trigger DSF-regulated genes<sup>(18)</sup>. Further,  
17 interspecies signaling in *P. aeruginosa* depends on the chain length of the *cis*-  
18 unsaturated fatty acid; molecules with chain lengths longer than 14 (this work) and  
19 less than 12<sup>(15, 18, 21, 22)</sup> have no activity. In particular, PA1396 does not respond to  
20 *cis*-2-decenoic acid, a molecule produced by *P. aeruginosa* and which is implicated in  
21 biofilm dispersal<sup>(15, 23)</sup>.

22

23 We demonstrate that DSF and *cis*-unsaturated fatty acid analogues enhance the  
24 tolerance of *P. aeruginosa* to a range of antibiotics including polymyxins, tobramycin  
25 and nalidixic acid; this action requires the sensor kinase PA1396. In contrast, Deng  
26 and colleagues<sup>(26)</sup> reported that both DSF and its analogues promote sensitivity of  
27 several Gram-positive pathogens including *Bacillus cereus* and *Staphylococcus*  
28 *aureus* to various antibiotics including kanamycin and gentamicin. The molecular  
29 mechanisms underlying these effects in *B. cereus* are unclear, but it is intriguing that  
30 *cis*- and *trans*-2-unsaturated fatty acids are equally effective in inducing the response.

31

32 We reasoned that if DSF signaling activates expression of genes involved in antibiotic  
33 tolerance, structural analogues of the molecule could act as antagonists. Accordingly,  
34 we show that various effects of DSF on *P. aeruginosa* including induction of *pmr*

1 gene expression and persistence in the mouse model is antagonised by the C23  
2 analogue. Antagonism of DSF action may have an application to control of *P.*  
3 *aeruginosa* in multispecies infections with pathogens that produce DSF family signals.  
4 An example is infection associated with cystic fibrosis (CF), where *P. aeruginosa* can  
5 occur together with *S. maltophilia* and *Burkholderia* species, both of which produce  
6 DSF and BDSF. The detection of DSF and BDSF signals at physiologically relevant  
7 levels in the sputum of CF patients supports the contention that interspecies signaling  
8 may occur in these infections, where it may affect the antibiotic sensitivity of *P.*  
9 *aeruginosa* as suggested by *in vitro* experiments.

10

11 Intriguingly, C23 has additional modulating effects on *P. aeruginosa* that cannot be  
12 attributed to its role as a DSF antagonist. For example, C23 affects *gcdH* and *murA*  
13 expression, two genes that do not respond to DSF. C23 also affects biofilm formation,  
14 both in co-culture with lung epithelial cells and in ‘complex’ medium, in DSF-  
15 independent manner and contributes to a more rapid clearance of *P. aeruginosa* from  
16 the lungs of mice. More detailed molecular knowledge of the activities of PA1396  
17 may afford insight into these different actions of C23. For example, can PA1396  
18 sense other environmental signals for biofilm formation (in addition to DSF) perhaps  
19 through TMHs I-III? Is transduction of these signals also blocked by C23? Can C23  
20 alone cause reduced auto-phosphorylation of PA1396 *in vivo*? Our unpublished work  
21 indicate the two-component regulator PA1397 is involved in signal transduction  
22 beyond PA1396 (S. An, unpublished). However, the findings are not consistent with a  
23 simple model in which DSF-induced phosphorylation of PA1397 directly activates  
24 *pmr* gene expression, indicating that other regulatory elements are involved. Future  
25 work will be directed at identifying these components.

26

27 In conclusion, pharmacological inhibition of DSF-mediated interspecies signaling in  
28 *P. aeruginosa* using a DSF analogue potential has identified a potential lead  
29 compounds for molecules that could be used as antibiotic adjuvants to control  
30 diseases caused by this human pathogen.

31

32

33

34

## 1 MATERIALS AND METHODS

### 2 Bacterial strains and culture conditions

3 *Pseudomonas aeruginosa* PAO1 was obtained from the Genetic Stock Center  
4 (<http://www.pseudomonas.med.ecu.edu/>)(strain PAO0001). Other bacterial strains  
5 and plasmids used in this study are listed in Supplementary Table 4. *P. aeruginosa*  
6 and other strains were routinely grown at 37°C in Luria–Bertani (LB) medium while  
7 *Xanthomonas campestris* strains were routinely grown at 30°C in NYGB medium,  
8 which comprises Bacteriological Peptone (Oxoid, Basingstoke, UK), 5 g l<sup>-1</sup>; yeast  
9 extract (Difco), 3 g l<sup>-1</sup> and glycerol, 20 g l<sup>-1</sup>. The FABL medium consists of 97%  
10 FAB medium [(NH<sub>4</sub>)<sub>2</sub>SO<sub>4</sub>, 2 g l<sup>-1</sup>; Na<sub>2</sub>HPO<sub>4</sub> 2H<sub>2</sub>O, 6 g l<sup>-1</sup>; KH<sub>2</sub>PO<sub>4</sub>, 3 g l<sup>-1</sup>; NaCl,  
11 3 g l<sup>-1</sup>; MgCl<sub>2</sub>, 93 mg l<sup>-1</sup>; CaCl<sub>2</sub>, 11 mg l<sup>-1</sup>) and 3% L medium (Bactotryptone,  
12 10 g l<sup>-1</sup>; yeast extract, 5 g l<sup>-1</sup>; sodium chloride, 5 g l<sup>-1</sup>; and D-glucose 1 g l<sup>-1</sup>).  
13 Cultures were also grown in artificial sputum medium which comprises: 5 g mucin  
14 from pig stomach mucosa (Sigma), 4 g DNA (Fluka), 5.9 mg diethylene triamine  
15 pentaacetic acid (Sigma), 5 g NaCl, 2.2 g KCl, 5 ml egg yolk emulsion (Oxoid) and  
16 5 g amino acids per 1 l water (pH 7.0) <sup>(16, 19)</sup>. The antibiotics used included tobramycin,  
17 polymyxin, kanamycin, rifampicin, gentamycin, spectinomycin, nalidixic acid,  
18 carbapenem and tetracycline at the indicated concentrations.

19

### 20 DNA manipulation

21 Molecular biological methods such as isolation of plasmid and chromosomal DNA,  
22 PCR, plasmid transformation, as well as restriction digestion were carried out using  
23 standard protocols. PCR products were cleaned using the Qiaquick PCR purification  
24 kit (Qiagen) and DNA fragments were recovered from agarose gels using Qiaquick  
25 minielute gel purification kit (Qiagen). Oligonucleotide primers were purchased from  
26 Sigma-Genosys. Primer sequences are provided in Supplementary Table 5.

27

### 28 Cloning the *PA1396* gene

29 The DNA fragments encoding the full-length PA1396 protein or truncation of interest  
30 were synthesized by Gene Oracle (Santa Clara, USA) in pGOv4 and sub-cloned into  
31 pET47b, pME6032 or pBAD/Myc-His before transformation into *E. coli* BL21 (DE3).  
32 Genomic regions are described in Supplementary Table 5. BL21 (DE3) cells were  
33 grown in LB media and induced with 0.25 mM IPTG; protein overexpression was  
34 carried out at 37°C for 1 h. Purification was achieved by Ni<sup>2+</sup> affinity chromatography



1 using the N-terminal His6 tag.

2

### 3 **Construction of targeted *PA1396-phoA* and *PA1396-lacZ* fusions**

4 Trans membrane domain (TMD) predictions of the *P. aeruginosa* PA1396 protein  
5 were obtained using the TOPRED<sup>(27)</sup>, TMHMM<sup>(28)</sup>, DAS-TMFILTER<sup>(29, 30)</sup> SOSUI<sup>(31)</sup>  
6 and HMMTOP<sup>(32)</sup> programs, each with their default settings.

7

8 Suitable fusion sites in the periplasmic and cytoplasmic loops were identified using a  
9 consensus based on the TMS prediction data obtained (Supplementary Fig. 1). The  
10 sites selected correspond to amino acids E4, N6, V37, E38, G66, A70, G107, G109,  
11 A137, Q139, Q141 and L205. The DNA fragments encoding the proteins of interest  
12 were synthesized by Gene Oracle (Santa Clara, USA) in pGOv4 and sub-cloned into  
13 topology reporter plasmids *phoA* (pRMCD28) and *lacZ* (pRMCD70). Genomic  
14 regions are described in Supplementary Table 5.

15

16 The fusion junction of each construct was confirmed by sequencing. Alkaline  
17 phosphatase assays were carried out according to Daniels *et al.* (1998)<sup>(33)</sup>.  $\beta$ -Gal  
18 assays were carried out according to Baker *et al.* (1997)<sup>(34)</sup>, except that overnight  
19 cultures were sub-cultured and grown to OD<0.6 before activity assays. Samples were  
20 assayed in triplicate over at least three independent experiments.

21

### 22 **Truncation and mutagenesis of PA1396 gene**

23 To construct strains harboring truncated *PA1396* alleles, we employed plasmid  
24 pME6032. We amplified *PA1396* alleles with deleted for amino acids 1–35, 1–40, 1–  
25 82, 1–104, 1–114, 1–136 and 1–143 respectively. These amplified fragments were  
26 ligated into pME6032 using appropriate restriction sites. Primer sequences and  
27 restriction sites are provided in Supplementary Table 5. The DNA fragments encoding  
28 the proteins with alterations in Y116, L117, T121, L123, L128, T135, P136, W138,  
29 A140, Q142, M144, L148, M149, V154, I155 and F157 were synthesized by Gene  
30 Oracle (Santa Clara, USA) in pGOv4 and sub-cloned pME6032. All constructed  
31 plasmids were transformed into strain PA1396 mutant selecting for Gm<sup>R</sup>.

32

33

34

## 1 **Synthesis of DSF analogues**

2 The starting point for the synthesis of *cis*-2-dodecenoic acid C2 (BDSF) and 11-  
3 methyl-dodec-2-enoic acid C1 (DSF) involved a Swern oxidation of the starting  
4 alcohol with dimethyl sulfoxide (DMSO) and oxalyl chloride at -78 °C to  
5 corresponding aldehydes decanal and 11-methyldecanal<sup>(35)</sup>. A subsequent Wittig  
6 reaction of the purified aldehyde with the modified Horner-Wadsworth-Emmons  
7 phosphonate salt ethyl [bis(2,2,2-trifluoroethoxy)-phosphinyl]acetate in the presence  
8 of sodium hydride (NaH) in THF afforded both the *cis*- and *trans*- $\alpha,\beta$ -unsaturated  
9 esters, ethyl dodec-2-enoate and ethyl 11-methyl-dodec-2-enoate<sup>(36)</sup>. Hydrolysis of the  
10 *cis*- $\alpha,\beta$ -unsaturated esters with lithium hydroxide (LiOH) in THF:MeOH:H<sub>2</sub>O (2:1:1  
11 (v/v/v)) gave required products C2 and C1<sup>(37,38)</sup>. Treatment of C1 with  
12 propylphosphonic anhydride and cyclopropylamine gave the required amide  
13 analogue<sup>(39)</sup>. DSF antagonist C23 was prepared by way of an EDCI-mediated  
14 coupling of C1 with methanesulfonamide in the presence of dimethylaminopyridine  
15 and subsequent isolation of the desired *cis*-isomer by reverse phase HPLC. All the  
16 chemicals and reagents were purchased from Sigma-Aldrich unless otherwise stated.  
17 Additional synthetic procedures and analytical data used in this study are delineated in  
18 Supplementary Note.

19

## 20 **DSF analogue structure analysis**

21 Nuclear magnetic resonance spectra <sup>1</sup>H, <sup>13</sup>C, <sup>1</sup>H-<sup>1</sup>H COSY and DEPT were recorded  
22 on a Bruker Avance 400 NMR Spectrometer (400 MHz for <sup>1</sup>H) and a Bruker Avance  
23 500 NMR Spectrometer (500 MHz for <sup>1</sup>H and 125 MHz for <sup>13</sup>C) with  
24 trimethylsilylchloride as an internal standard in CDCl<sub>3</sub>. <sup>1</sup>H-<sup>13</sup>C correlated HMBC and  
25 HMQC spectra were performed by Bruker Avance 500 spectrometer. Mass spectra  
26 ESI-MS and High-Resolution Mass Spectra ESI-MS were performed on a  
27 Waters/Micromass: LCT Premier Time of Flight and a Quattro Micro triple  
28 quadrupole instruments respectively. Infrared spectra were measured using NaCl  
29 plates on a Perkin Elmer paragon 1000 FT-IR spectrometer.

30

## 31 **DSF bioassays**

32 The original DSF bioassay is based on its ability to restore endoglucanase production  
33 to *rpfF* mutant of *Xcc* as described in <sup>(40)</sup>. DSF activity was expressed as the fold  
34 increases in endoglucanase activity over the control. We also used the bioassay

1 previously described<sup>(16)</sup> that relies on DSF-dependent induction of fluorescence (*pmr-*  
2 *gfp*) in *P. aeruginosa* PAO1.

3

#### 4 **Reconstitution and phosphorylation of PA1396-His in liposomes**

5 Using a variation in the method previously described<sup>(41,42)</sup>, *E. coli* strains containing  
6 pBAD/*Myc*-His (PA1396-pBAD/*Myc*-His) were induced with 0.2% arabinose and  
7 purified through nickel columns according to the manufacturer's instructions (Qiagen).  
8 Liposomes were reconstituted as previously described<sup>(24,41)</sup>. Briefly, 50 mg of *E. coli*  
9 phospholipids (44  $\mu$ L of 25 mg/mL; Avanti Polar Lipids) were evaporated and then  
10 dissolved into 5 ml of potassium phosphate buffer containing 80 mg of *N*-octyl- $\beta$ -D-  
11 glucopyranoside. The solution was dialyzed overnight against potassium phosphate  
12 buffer. The resulting liposome suspension was subjected to freeze-thaw in liquid  
13 nitrogen. Liposome size was analyzed by dynamic light scattering. Liposomes were  
14 stored at 4 °C. Liposomes were then destabilized by the addition of 26 mg of  
15 dodecylmaltoside, and 5 mg of PA1396-His (dual Myc- and His- tagged protein) was  
16 added, followed by stirring at room temperature for 10 min.

17

18 Two hundred-sixty milligrams of Biobeads (BioRad) were then added to remove the  
19 detergent, and the resulting solution was allowed to incubate at 4°C overnight. The  
20 supernatant was then incubated with fresh Biobeads (BioRad) for 1 h in the morning.  
21 The resulting liposomes containing reconstituted PA1396-His were frozen in liquid  
22 N<sub>2</sub> and stored at -80°C until used. The orientation of HKs in the liposome system  
23 was established by other groups and can be confirmed from the accessibility of ATP  
24 to the kinase site and anti-Myc antisera to the C-terminal PA1396-MycTag without  
25 disruption of the liposomes.

26

27 Twenty microliters of the liposomes containing PA1396-His were adjusted to 10 mM  
28 MgCl<sub>2</sub> and 1 mM DTT, and various concentrations of agonist or antagonist, frozen  
29 and thawed rapidly in liquid nitrogen, and kept at room temperature for 1 h (this  
30 allows for the signals to be loaded within the liposomes). [ $\gamma$ 32P]dATP (0.625  $\mu$ l) (110  
31 TBq/mmol) was added to each reaction. To some reactions, 10  $\mu$ g of PA1396-His was  
32 added. At each time point (0, 10, 30, 60, or 120 min), 20  $\mu$ l of SDS loading buffer was  
33 added. For all experiments involving PA1396 alone, a time point of 10 min was used.  
34 The samples were run on SDS/PAGE without boiling and visualized using a

1 Molecular Dynamics PhosphorImager. These were quantified by ImageJ software.

2

### 3 **Biofilm Assays**

4 Biofilm was assessed by attachment to glass and was determined by crystal violet  
5 staining. Log-phase-grown bacteria were diluted to  $OD_{600} = 0.02$  in LB broth and  
6 5 ml was incubated at 37°C for 24 h in 14-ml glass tubes. After gently pouring off the  
7 media, bacterial pellicles were wash  
8 ed twice with water and were then stained with 0.1% crystal violet. Tubes were  
9 washed and rinsed with water until all unbound dye was removed. Bound crystal  
10 violet was eluted in ethanol and measured at  $OD_{595}$ . Three independent assays were  
11 carried out for each strain.

12

### 13 **Polymyxin killing curves**

14 Killing curves were carried out at 37°C temperature as previously described<sup>(14, 16)</sup>. In  
15 short, mid-log phase cultures ( $OD_{600}$  0.4–0.6) of PAO1 wild-type strain, PAO1  
16 supplemented with 50  $\mu$ M DSF or PA1396 mutant grown in BM2 medium  
17 supplemented with 0.5 mM and 2 mM  $Mg^{2+}$  were diluted 1:100 into 30 mM sodium  
18 phosphate buffer, pH 7.0, containing 4  $\mu$ g ml<sup>-1</sup> of polymyxin B sulphate and 5  $\mu$ g ml<sup>-1</sup>  
19 polymyxin E sulphate (Sigma). Samples were shaken gently, and aliquots removed at  
20 specified time intervals were assayed for survivors by plating appropriate dilutions  
21 onto LB agar.

22

### 23 **Infection and treatment of animals**

24 All animal experiments were approved by the Animal Ethics Committees of Queens  
25 College Belfast and Nanyang Technological University. Mouse infection was  
26 performed using a variation on the mouse model described in <sup>(16, 43)</sup>. Briefly, *P.*  
27 *aeruginosa* strains were grown in Luria broth at 37 °C overnight with shaking, after  
28 which bacteria were collected by centrifugation and resuspended in PBS. The exact  
29 number of bacteria was determined by plating serial dilutions of each inoculum on  
30 pseudomonas isolation agar plates. Female C57BL/6 mice (approximately 8-weeks  
31 old) were anesthetized and intranasally inoculated with 20  $\mu$ l of the bacterial  
32 suspension ( $1 \times 10^7$  CFU/mouse) in PBS with PAO1, PAO1/DSF, PAO1/or selected  
33 DSF analogue or *PAI396* mutant. Mice were killed at 24 h post-infection by  
34 intraperitoneal injection of 0.3 ml of 30% pentobarbital. Lungs were harvested

1 aseptically and homogenized in sterile PBS. A 10-fold serial dilution of lung  
2 homogenates was plated on *Pseudomonas* isolation agar. The results (means±s.d.) are  
3 expressed as CFU/lung.

4  
5 For animal experiments examining the effectiveness of tobramycin treatment against  
6 *P. aeruginosa* during respiratory infection, the mice were intranasally inoculated with  
7 20 µl of the bacterial suspension in PBS with PAO1, PAO1/DSF, PAO1/or selected  
8 DSF analogue ( $1 \times 10^7$  CFU/mouse). Each mouse received was administered  
9 tobramycin 1 h post-infection. 24 h after infection, the lungs were removed,  
10 homogenized with PBS and plated on agar to determine the number of viable bacteria.  
11 The results (means±s.d.) are expressed as CFU/lung.

12

### 13 **Gene expression-profiling experiments**

14 For the *in vivo* RNA samples, infected animals as described above were euthanized  
15 ~24 h post-infection. RNA was isolated from airway homogenate pellets using Trizol  
16 according to the manufacturer's instructions. Samples were treated with DNase, then  
17 rRNA was removed from 1 to 5 µg of total RNA using the RiboZero kit for Gram-  
18 negative bacteria (Epicentre). rRNA-depleted samples were concentrated by EtOH  
19 precipitation. cDNA synthesis and hybridization to Affymetrix GeneChip *P.*  
20 *aeruginosa* genome arrays were carried out by a commercial Affymetrix Genechip  
21 service supplier (Conway Institute of Biomolecular & Biomedical Research, UCD,  
22 Ireland). Microarray data analysis was performed using Biomedical Genomics  
23 Workbench software (Qiagen).

24

### 25 **Quantitative real-time PCR assays**

26 *P. aeruginosa* strains (including mutants) were inoculated at an OD<sub>600</sub> of 0.1 in LB  
27 (with 50 µM DSF-like signal molecules if used). Cultures were harvested during mid-  
28 log phase (OD<sub>600</sub> = 0.6) and RNA was extracted using the High Pure RNA Isolation  
29 Kit (Roche). The expression of genes was monitored by qRT-PCR, as described  
30 previously<sup>(44,45)</sup>.

31

### 32 **Statistical Analysis**

33 Significant differences between the means plus or minus standard deviations (SDs) of  
34 different groups were examined using a two-tailed unpaired Student's *t* test. A P value

1 of less than 0.05 was regarded as statistically significant. All variables remained  
2 significant after multiple testing.

3

#### 4 **ACKNOWLEDGMENTS**

5 We thank Robert Ryan, Max Dow, Liang Yang and Delphine Caly for initial data,  
6 helpful discussions and critical reading of the manuscript. Ian Gilbert and Claire  
7 Mackenzie who provided help in resynthesizing several DSF analogues when required.  
8 This work was supported by The Wellcome Trust grant 100204/A/12/Z.

9

#### 10 **AUTHOR CONTRIBUTIONS**

11 SA designed the study. SA, JT, KBT and TPOS designed methods and experiments,  
12 carried out the laboratory experiments, analyzed the data, interpreted the results and  
13 wrote the paper. JT, JM, TPOS, MKG were involved in the synthesis of DSF  
14 analogues, worked on associated data collection and their interpretation. SA and KBT  
15 performed microarray and qPCR experiments and interpreted data. SA, KBT and RI  
16 designed biofilm and infection experiments, discussed analyses, interpretation, and  
17 presentation. MAV contributed to the editing and writing of the article. All authors  
18 have contributed with edits, seen and approved the manuscript.

19

#### 20 **COMPETING FINANCIAL INTERESTS**

21 The authors declare no competing financial interests.

22

#### 23 **ACCESSION CODES**

24 The microarray data were deposited in the Gene Expression Omnibus (GEO) database  
25 with series record GSE110126.

26

27

28

29

30

31

32

33

34

1

2 **REFERENCES**

- 3 1. **Levy SB, Marshall B** (2004) Antibacterial resistance worldwide: causes,  
4 challenges and responses. *Nat Med* **10**: S122-S129.
- 5 2. **Taubes G** (2008) The bacteria fight back. *Science* **321**: 356-361.
- 6 3. **Sleator RD, Hill C** (2008) Battle of the bugs. *Science* **321**: 1294-1295.
- 7 4. **Sperandio V** (2007) Novel approaches to bacterial a infection therapy by  
8 interfering with bacteria-to-bacteria signaling. *Expert Rev Anti Infect Ther* **5**:  
9 271-276.
- 10 5. **Curtis MM, Russell R, Moreira CG, Adebisin AM, Wang C, Williams NS,**  
11 **Taussig R, Stewart D, Zimmern P, Lu B, Prasad RN, Zhu C, Rasko DA,**  
12 **Huntley JF, Falck JR, Sperandio V** (2014) QseC inhibitors as an  
13 antivirulence approach for Gram-negative pathogens. *mBIO* **5**.
- 14 6. **Bolitho ME, Perez LJ, Koch MJ, Ng W-L, Bassler BL, Semmelhack MF.**  
15 (2011) Small molecule probes of the receptor binding site in the *Vibrio*  
16 *cholerae* CAI-1 quorum sensing circuit. *Bioorg. Med. Chem* **19**: 6906-6918.
- 17 7. **O'Loughlin CT, Miller LC, Siryaporn A, Drescher K, Semmelhack MF,**  
18 **Bassler BL.** (2013) A quorum-sensing inhibitor blocks *Pseudomonas*  
19 *aeruginosa* virulence and biofilm formation. *Proc Natl Acad Sci U S A.*  
20 110(44):17981-6.
- 21 8. **Williams P, Camara M** (2009) Quorum sensing and environmental  
22 adaptation in *Pseudomonas aeruginosa*: a tale of regulatory networks and  
23 multifunctional signal molecules. *Curr Opin Microbiol* **12**:182-191.
- 24 9. **Chugani S, Greenberg EP** (2014) An evolving perspective on the  
25 *Pseudomonas aeruginosa* orphan quorum sensing regulator QscR. *Front Cell*  
26 *Infect Microbiol* **4**.
- 27 10. **Jimenez PN, Koch G, Thompson JA, Xavier KB, Cool RH, Quax WJ**  
28 (2012) The multiple signaling systems regulating virulence in *Pseudomonas*  
29 *aeruginosa*. *Mol Biol Rev* **76**: 46-65.
- 30 11. **Bjarnsholt T, Tolker-Nielsen T, Hoiby N, Givskov M** (2010) Interference of  
31 *Pseudomonas aeruginosa* signalling and biofilm formation for infection  
32 control. *Expert Rev Mol Med* **12**.
- 33 12. **Jakobsen TH, van Gennip M, Phipps RK, Shanmugham MS, Christensen**  
34 **LD, Alhede M, Skindersoe ME, Rasmussen TB, Friedrich K, Uthe F,**



- 1           **Jensen PO, Moser C, Nielsen KF, Eberl L, Larsen TO, Tanner D, Hoiby**  
2           **N, Bjarnsholt T, Givskov M** (2012) Ajoene, a sulfur-rich molecule from  
3           Garlic, inhibits genes controlled by quorum sensing. *Antimicrob Agents*  
4           *Chemother* **56**: 2314-2325.
- 5    13.   **Kim H-S, Lee S-H, Byun Y, Park H-D** (2015) 6-Gingerol reduces  
6           *Pseudomonas aeruginosa* biofilm formation and virulence via quorum sensing  
7           inhibition. *Sci Rep* **5**.
- 8    14.   **Ryan RP, Fouhy Y, Garcia BF, Watt SA, Niehaus K, Yang L, Tolker-**  
9           **Nielsen T, Dow JM** (2008) Interspecies signalling via the *Stenotrophomonas*  
10           *maltophilia* diffusible signal factor influences biofilm formation and  
11           polymyxin tolerance in *Pseudomonas aeruginosa*. *Mol Micro* **68**: 75-86.
- 12   15.   **Ryan RP, Dow JM** (2011) Communication with a growing family: diffusible  
13           signal factor (DSF) signaling in bacteria. *Trend Microbiol* **19**: 145-152.
- 14   16.   **Twomey KB, O'Connell OJ, McCarthy Y, Dow JM, O'Toole GA, Plant**  
15           **BJ, Ryan RP** (2012) Bacterial cis-2-unsaturated fatty acids found in the cystic  
16           fibrosis airway modulate virulence and persistence of *Pseudomonas*  
17           *aeruginosa*. *ISME J* **6**: 939-950.
- 18   17.   **Beaulieu ED, Ionescu M, Chatterjee S, Yokota K, Trauner D, Lindow S**  
19           (2013) Characterization of a diffusible signaling factor from *Xylella fastidiosa*.  
20           *MBIO* **4**.
- 21   18.   **Ryan RP, Dow JM** (2008) Diffusible signals and interspecies communication  
22           in bacteria. *Microbiol* **154**: 1845-1858.
- 23   19.   **Anderson GG, Moreau-Marquis S, Stanton BA, O'Toole GA** (2008) In  
24           vitro analysis of tobramycin-treated *Pseudomonas aeruginosa* Biofilms on  
25           cystic fibrosis-derived airway epithelial cells. *Infect Immun* **76**: 1423-1433.
- 26   20.   **Geller DE, Pitlick WH, Nardella PA, Tracewell WG, Ramsey BW** (2002)  
27           Pharmacokinetics and bioavailability of aerosolized tobramycin in cystic  
28           fibrosis. *Chest* **122**: 219-226.
- 29   21.   **Deng Y, Wu J, Eberl L, Zhang L-H** (2010) Structural and functional  
30           characterization of diffusible signal factor family quorum-sensing signals  
31           produced by members of the *Burkholderia cepacia* complex. *Appl Environ*  
32           *Microbiol.* **76**: 4675-4683.
- 33   22.   **Wang LH, He YW, Gao YF, Wu JE, Dong YH, He CZ, Wang SX, Weng**  
34           **LX, Xu JL, Tay L, Fang RX, Zhang LH** (2004) A bacterial cell-cell

- 1 communication signal with cross-kingdom structural analogues. *Mol*  
2 *Microbiol* **51**: 903-912.
- 3 23. **McCarthy Y, Yang L, Twomey KB, Sass A, Tolker-Nielsen T,**  
4 **Mahenthiralingam E, Dow JM, Ryan RP** (2010) A sensor kinase  
5 recognizing the cell-cell signal BDSF (cis-2-dodecenoic acid) regulates  
6 virulence in *Burkholderia cenocepacia*. *Mol Microbiol* **77**: 1220-1236.
- 7 24. **Cai Z, Yuan ZH, Zhang H, Pan Y, Wu Y, Tian XQ, Wang FF, Wang L,**  
8 **Qian W.** (2017) Fatty acid DSF binds and allosterically activates histidine  
9 kinase RpfC of phytopathogenic bacterium *Xanthomonas campestris* pv.  
10 *campestris* to regulate quorum-sensing and virulence. *PLoS Pathog.* 2017 Apr  
11 3;13(4):e1006304. doi: 10.1371/journal.ppat.1006304.
- 12 25. **Ng W-L, Wei Y, Perez LJ, Cong J, Long T, Koch M, Semmelhack MF,**  
13 **Wingreen NS, Bassler BL** (2010) Probing bacterial transmembrane histidine  
14 kinase receptor-ligand interactions with natural and synthetic molecules. *Proc*  
15 *Natl Acad Sci USA* **107**:5575-5580.
- 16 26. **Deng Y, Lim A, Lee J, Chen S, An S, Dong Y-H, Zhang L-H** (2014)  
17 Diffusible signal factor (DSF) quorum sensing signal and structurally related  
18 molecules enhance the antimicrobial efficacy of antibiotics against some  
19 bacterial pathogens. *BMC Microbiol* **14**.
- 20 27. **Vonheijne G** (1992) Membrane-protein structure prediction - Hydrophobicity  
21 analysis and the positive-inside rule. *J Mol Biol* **225**: 487-494.
- 22 28. **Sonnhammer EL, von Heijne G, Krogh A** (1998) A hidden Markov model  
23 for predicting transmembrane helices in protein sequences. *Intel Sys Mol Biol*  
24 **6**:175-182.
- 25 29. **Cserzo M, Eisenhaber F, Eisenhaber B, Simon I** (2002) On filtering false  
26 positive transmembrane protein predictions. *Protein Eng* **15**: 745-752.
- 27 30. **Cserzo M, Wallin E, Simon I, vonHeijne G, Elofsson A** (1997) Prediction  
28 of transmembrane alpha-helices in prokaryotic membrane proteins: the dense  
29 alignment surface method. *Protein Eng* **10**: 673-676.
- 30 31. **Hirokawa T, Boon-Chieng S, Mitaku S.** (1998) SOSUI: classification and  
31 secondary structure prediction system for membrane proteins. *Bioinfo* **14**:378-  
32 379.
- 33 32. **Tusnady GE, Simon I** (2001) The HMMTOP transmembrane topology  
34 prediction server. *Bioinfo* **17**: 849-850.

- 1 33. **Daniels C, Vindurampulle C & Morona R** (1998) Overexpression and  
2 topology of the *Shigella flexneri* O-antigen polymerase (Rfc/Wzy). *Mol*  
3 *Microbiol* **28**: 1211–1222.
- 4 34. **Baker SJ, Daniels C & Morona R** (1997) PhoP/Q regulated genes in  
5 *Salmonella typhi* identification of melittin sensitive mutants. *Microb Pathogen*  
6 **22**: 165–179
- 7 35. **Tidwell TT** (1990) Oxidation of alcohols by activated dimethyl-sulfoxide and  
8 related reactions - an update. *Synthesis* **5**:857-870.
- 9 36. **Takeda T** (2004) *Modern Carbonyl Olefination: Methods and Applications*.  
10 Wiley.
- 11 37. **Dayal B, Salen G, Tint GS, Shefer S, Benz SW** (1990) Use of positive ion  
12 fast atom bombardment mass spectrometry for rapid identification of a bile  
13 alcohol glucuronide isolated from cerebrotendinous Xanthomatosis patients.  
14 *Steroids* **55**:74-78.
- 15 38. **Sivasubramanian K, Kaanumalle LS, Uppili S, Ramamurthy V** (2007)  
16 Value of zeolites in asymmetric induction during photocyclization of  
17 pyridones, cyclohexadienones and naphthalenones. *Org Biomol Chem* **5**:  
18 1569-1576.
- 19 39. **Montalbetti C, Falque V** (2005) Amide bond formation and peptide coupling.  
20 *Tetrahedron* **61**: 10827-10852.
- 21 40. **Barber CE, Tang JL, Feng JX, Pan MQ, Wilson TJG, Slater H, Dow JM,**  
22 **Williams P, Daniels MJ** (1997) A novel regulatory system required for  
23 pathogenicity of *Xanthomonas campestris* is mediated by a small diffusible  
24 signal molecule. *Mol Microbiol* **24**: 555-566.
- 25 41. **Clarke MB, Hughes DT, Zhu C, Boedeker EC, Sperandio V** (2006) The  
26 QseC sensor kinase: A bacterial adrenergic receptor. *Proc Natl Acad Sci USA*  
27 **103**:10420-10425.
- 28 42. **Rigaud JL, Levy D** (2003) Reconstitution of membrane proteins into  
29 liposomes. *Liposomes* **372**:65-86.
- 30 43. **McCaughey LC, Ritchie ND, Douce GR, Evans TJ, Walker D** (2016)  
31 Efficacy of species-specific protein antibiotics in a murine model of acute  
32 *Pseudomonas aeruginosa* lung infection. *Sci Rep.* **6**:30201.

33  
34

- 1 44. **An S-Q, Caly DL, McCarthy Y, Murdoch SL, Ward J, Febrer M, Dow**  
2 **JM, Ryan RP** (2014) Novel cyclic di-GMP effectors of the YajQ protein  
3 family control bacterial virulence. *Plos Pathogens* **10**: e1004429.
- 4 45. **An S-Q, Febrer M, McCarthy Y, Tang D-J, Clissold L, Kaithakottil G,**  
5 **Swarbreck D, Tang J-L, Rogers J, Dow JM, Ryan RP** (2013) High-  
6 resolution transcriptional analysis of the regulatory influence of cell-to-cell  
7 signalling reveals novel genes that contribute to *Xanthomonas*  
8 phytopathogenesis. *Mol Micro* **88**:1058-1069.

9  
10  
11  
12  
13  
14  
15  
16  
17  
18  
19  
20  
21  
22  
23  
24  
25  
26  
27  
28  
29  
30  
31  
32  
33  
34

1 **FIGURE LEGENDS**

2 **Figure 1. Membrane topology, trans-membrane helices and key residues of**  
3 **sensor kinase PA1396 involved in DSF perception.**

4 (a) Graphical representation of the topological predictions of the position of trans-  
5 membrane helices (TMHs) of PA1396 made by various membrane topology  
6 prediction programs. The location of soluble segments (cytosolic or periplasmic) and  
7 the positions of predicted TMHs are indicated. TMHs are designated by Roman  
8 numerals.

9  
10 (b) A model of membrane topology of PA1396 derived from reporter fusion data.  
11 Phenotypes of *phoA* or *lacZa* reporter fusions together with the amino acid position at  
12 which the reporters were fused are indicated by Green (PhoA activity) and Pink (LacZ  
13 activity). Numbers next to each predicted TMH indicate the position of amino acid  
14 residues at the predicted boundaries between soluble and membrane-embedded  
15 regions.

16  
17 (c) Domains of PA1396 as predicted by SMART. Domain abbreviations are: HisKA:  
18 His Kinase A (phosphoacceptor) domain; HATPase\_c: Histidine kinase-like ATPases;  
19 REC: CheY-homologous receiver domain. Blue bars with Roman numerals indicate  
20 different transmembrane helices. The lower part of the Figure indicates the effect of  
21 progressive N-terminal truncation of PA1396 on the ability of the sensor to respond to  
22 DSF, as measured by activation of *pmrAB* gene expression and resistance to  
23 polymyxin B. DNA fragments expressing different His6-tagged constructs indicated  
24 by the black lines were cloned into pBBR1MCS vector and introduced into the  
25 *PA1396* mutant strain. Response to DSF and antibiotic tolerance are reported.

26  
27 (d) Dose–response relationships for activation of a *pmr-gfp* transcriptional fusion by  
28 DSF in *P. aeruginosa* strains expressing either wild-type PA1396 or representative  
29 variants. The data shown is of a single experiment of three repeated experiments  
30 which showed the same trend.

31  
32  
33  
34

1 **Figure 2. The biological activity of DSF analogues reveals important structural**  
2 **features needed for perception by PA1396.**

3 (a) The structure of DSF (*cis*-11-methyl-2-dodecenoic acid) highlighting structural  
4 elements. Below this are the chemical structures of the 27 synthetic derivatives of  
5 DSF, all validated by ESI-MS and <sup>1</sup>H NMR spectra as described in the Methods.

6

7 (b) The biological activity of DSF and its derivatives in activation of the *pmr-gfp*  
8 fusion. Samples were tested at a concentration of 0.01 μM (the minimum  
9 concentration of *cis*-11-methyl-2-dodecenoic acid required for activation of the  
10 bioassay). Values are the average of three repeats (mean± standard deviation).

11

12 (c) Dose–response of DSF (*cis*-11-methyl-2-dodecenoic acid) and C11 (*cis*-2-  
13 tetradecenoic acid) on activation of *pmr-gfp* transcriptional fusion in wild-type  
14 PA1396 and a strain expressing the variant T121A/L123A/L128A with alteration in  
15 conserved amino acids of TMH IV. The data of GFP fluorescence shown is of a  
16 single experiment of three repeats which showed the same trend.

17

18 **Figure 3. DSF analogues inhibit PA1396 phosphorylation and DSF-dependent**  
19 **activation of genes involved in virulence, antibiotic resistance and biofilm**  
20 **formation.**

21 (a) The effects of analogues (at 10 μM) on activation of the *pmr-gfp* transcriptional  
22 fusion by DSF (50 μM) was measured as GFP fluorescence. Data shown are means of  
23 three replicates and error bars indicate the standard deviations. The asterisks indicate  
24 those analogues for which the level of *gfp* expression was significantly different from  
25 that of DSF alone (\*\*p < 0.01 as determined by using the Student' t test).

26

27 (b) Dose–response relationships of the effects of selected analogues on DSF  
28 activation of the *pmr-gfp* transcriptional fusion in wild-type *Pseudomonas aeruginosa*.  
29 DSF was present at 50 μM. The analogues tested were C12 (*cis*-13-methyl  
30 tetradecenoic acid), C23 (*cis*-11-methyl dodecenoyl methyl sulphonamide) and C24  
31 (*cis*-11-methyl dodecenoyl cyclopropanamide). The data of GFP fluorescence shown  
32 is of a single experiment of three repeats, which showed the same trend.

33

1 (c) PA1396 auto-phosphorylation in response to DSF and analogues. (i) Schematic  
2 representation of the orientation of PA1396 in the liposome assay. Domain  
3 abbreviations are: HisKA: His Kinase A (phosphoacceptor) domain; HATPase\_c:  
4 Histidine kinase-like ATPases; REC: CheY-homologous receiver domain. Blue bars  
5 indicate different transmembrane helices. (ii) PA1396 auto-phosphorylates in the  
6 liposome (lanes 1-3; which are triplicate assays), but increased phosphorylation is  
7 seen in response to 10  $\mu$ M DSF (lanes 4-6); (iii) PA1396 phosphorylation in response  
8 to 10  $\mu$ M DSF (lanes 1-3) is abrogated in the presence of C23 (lanes 4-6); (iv, v)  
9 PA1396 (T121A/L123A/L128A) variant protein auto-phosphorylates but does not  
10 response to the presence of DSF and/or C23.

11

12 (d) Differential expression of selected genes implicated in virulence, antibiotic  
13 resistance or biofilm formation in the presence DSF, C23 and DSF in combination  
14 with C23. Transcript levels of *PA0806*, *PA0901*, *PA1560*, *PA2966*, *PA4358*, *PA4359*,  
15 *PA4599*, *PA4774*, *PA4775*, *PA4776* and *PA5505* were examined. The qRT-PCR data  
16 were normalised to 16S rRNA and are presented as the fold change with respect to the  
17 wild type for each gene. Data (means  $\pm$  standard deviation) are from three  
18 independent biological experiments.

19

20

21

22

23

24

25

26

27

28

29

30

31

32

33



1 **Figure 4. Effects of analogues on DSF-induced biofilm formation and persistence**  
2 **of *P. aeruginosa* during infection.**

3 (a) Effect of DSF and C23 alone or in combination on attachment of *P. aeruginosa*  
4 strains to CFBE epithelial cells. For these experiments, compounds (0.5  $\mu$ M) were  
5 added to the co-culture at 1h and bacterial attachment to the CFBE epithelial cells was  
6 measured after 24 h (see Materials and Methods). (\* $P < 0.01$ , \*\* $p < 0.05$ , two-tailed  
7 Student's *t*-test).

8

9 (b) Effect of 0.5  $\mu$ M DSF and C23 alone or in combination on attachment of *P.*  
10 *aeruginosa* to a glass surface as assessed by crystal violet staining. Biofilm biomass is  
11 measured as a ratio of absorbance at 550 and 600 nm. Values given are the mean and  
12 standard deviation of triplicate measurements. Asterisks indicate values significantly  
13 different from the wild-type ( $p < 0.01$ , two-tailed Student's *t*-test).

14

15 (c) Effect of administration of C23 on *P. aeruginosa* mouse airway infection.  
16 C57BL/6 mice were infected intranasally with  $1 \times 10^7$  CFU of *P. aeruginosa* PAO1  
17 and treated by inhaling PBS with or without 50  $\mu$ M C23. After 24 h infection, the  
18 mice were euthanized, and bacterial loads were determined in lung homogenates.  
19 Values represent the mean  $\pm$  standard deviation. Statistical significance by two tailed  
20 Student's *t*-test is indicated: \*  $P < 0.05$ , \*\*  $P < 0.01$ .

21

22 (d) Venn diagrams showing results of comparative transcriptome profiling of the  
23 effects of addition of either DSF or DSF with C23 on gene expression in wild-type *P.*  
24 *aeruginosa* during mouse lung infection. The comparator is *P. aeruginosa* in mouse  
25 lung with no compound addition. Genes significantly up-regulated ( $> 1.25$ -fold,  $P_{adj} <$   
26  $1 \times 10^{-5}$ ) are indicated in red, those significantly down-regulated are indicated in  
27 green. The complete set of regulated genes is depicted in Supplementary Table 3.

28

29 (e) qRT-PCR analysis of expression levels of selected genes implicated in virulence  
30 and biofilm formation in response to addition of DSF or DSF and C23 in wild-type *P.*  
31 *aeruginosa* during mouse lung infection. Transcript levels of *PA0524*, *PAI709*,  
32 *PA2659*, *PA3876*, *PA4774*, *PA4776*, *PA4777* and *PA3841* were examined. The qRT-  
33 PCR data were normalised to 16S rRNA and are presented as the fold change with

1 respect to the wild-type for each gene. Data (means  $\pm$  standard deviation) are  
2 representative of three independent biological experiments.

3

4

5

6

7

8

9

10

11

12

13

14

15

16

17

18

19

20

21

22

23

24

25

26

27

28

29

30

31

32

33

1 **Figure 5. Effects of the DSF analogue C23 on antibiotic resistance of *P.***

2 ***aeruginosa* both *in vitro* and during infection.**

3 (a) Effect of addition of DSF, C23 and DSF together with C23 on tolerance of *P.*  
4 *aeruginosa* to polymyxins. Time-courses of killing of *P. aeruginosa* by 4 µg ml<sup>-1</sup>  
5 polymyxin B were established for bacteria suspended in sodium phosphate buffer.  
6 Bacteria for these experiments were grown in BM2 medium with glucose  
7 supplemented with 2 mM Mg<sup>2+</sup>. DSF and C23 were added to these cultures to a final  
8 concentration of 50 µM. The data shown is of a single experiment of three repeated  
9 experiments which showed the same trend.

10

11 (b) Effect of addition of DSF, C23 and DSF with C23 on antibiotic resistance gene  
12 expression in clinical isolates of *P. aeruginosa* as compared to the laboratory strain  
13 PAO1. Transcript levels of *PA4775* in PAO1, the isogenic *PA1396* mutant and a  
14 selection of clinical isolates of *P. aeruginosa* (CF3, CF9, CF14, CF21 and CF 22)  
15 were examined using qRT-PCR as described in Methods. The qRT-PCR data were  
16 normalised to 16S rRNA and are presented as the fold change relative to the wild-type  
17 for each gene in each strain with no addition. Data (means ± standard deviation) are  
18 representative of three independent biological experiments. The statistical  
19 significance of the difference between DSF alone and C23 plus DSF or C23 alone was  
20 examined by two tailed Student's *t*-test and are indicated as: \*: *P*<0.05; \*\*: *P*<0.01.

21

22 (c) Effect of administration of C23 on *P. aeruginosa* clearance by tobramycin  
23 treatment in the mouse airway. C57BL/6 mice were infected intranasally with 1 × 10<sup>7</sup>  
24 CFU *P. aeruginosa* PAO1 and treated by inhaling PBS with or without 50 µM C23.  
25 Tobramycin was administered at a concentration of 30 mg/kg 1 h after infection. After  
26 24 h of infection, the mice were harvested, and bacterial loads were determined in  
27 lung homogenates. Values represent the mean ± standard deviation. Statistical  
28 significance of the difference between C23 plus tobramycin treatment and tobramycin  
29 alone was examined by two tailed Student's *t*-test and are indicated: \*\*: *P*<0.01.

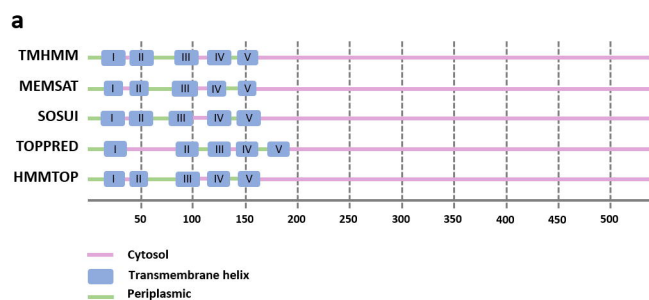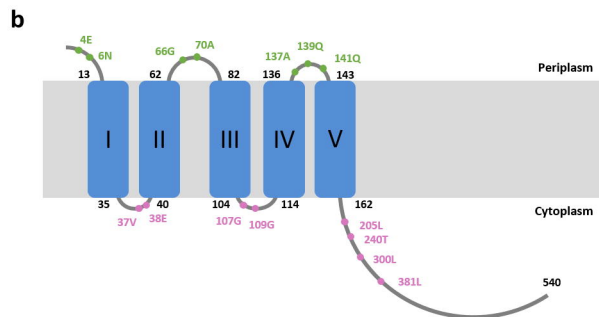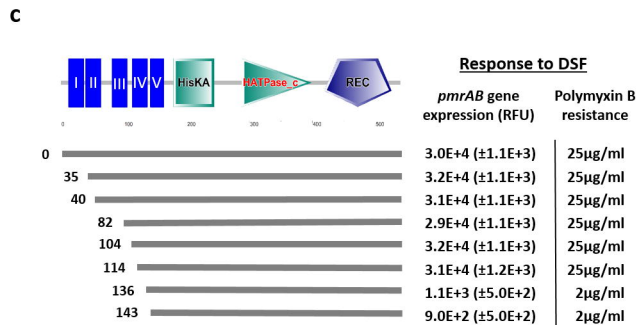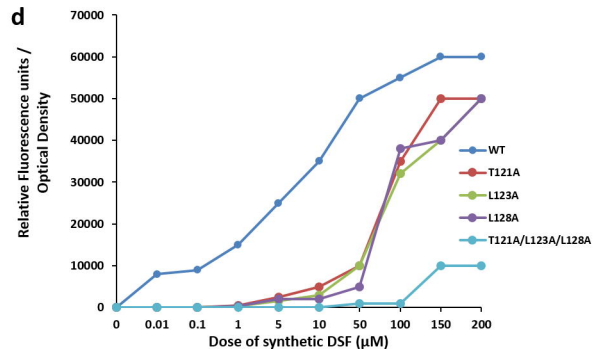

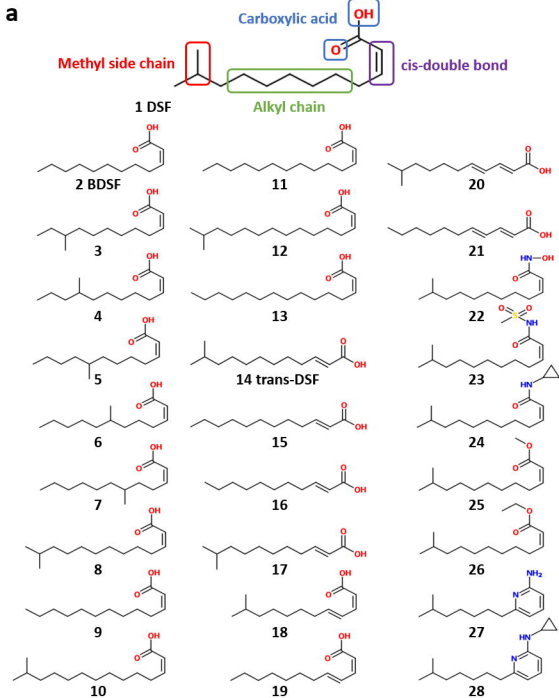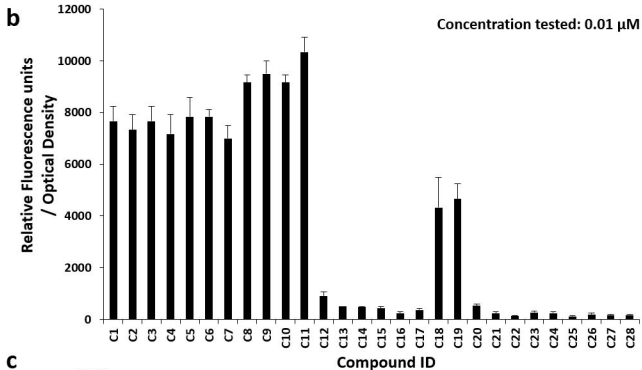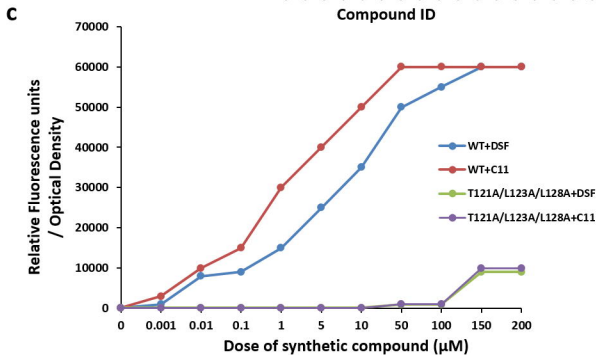

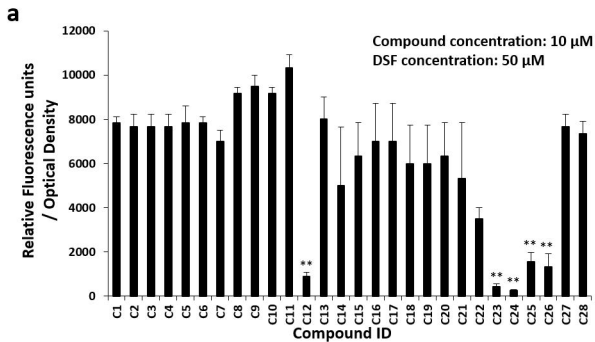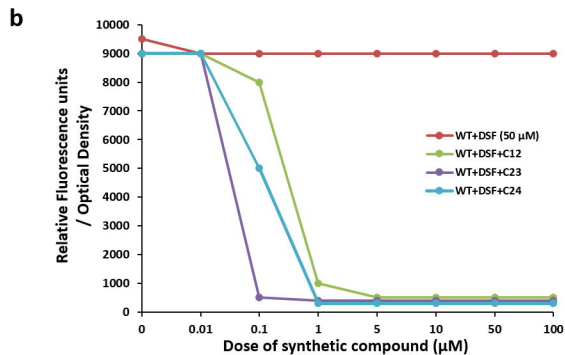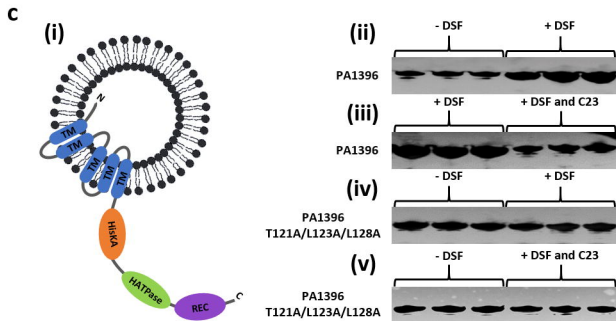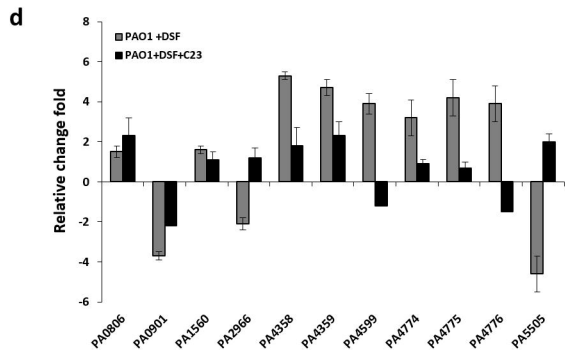

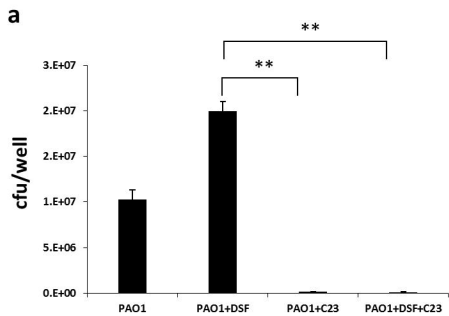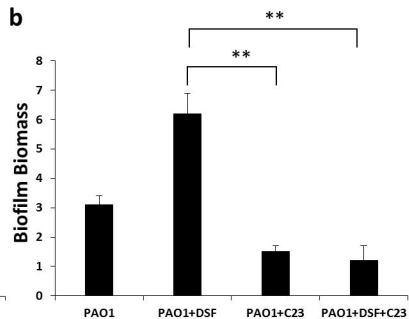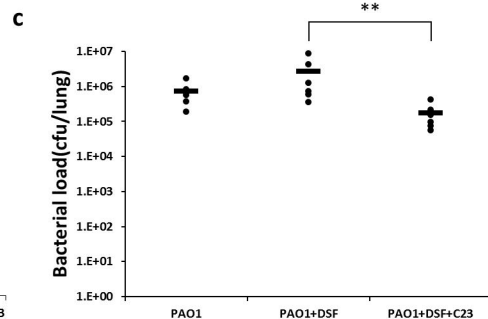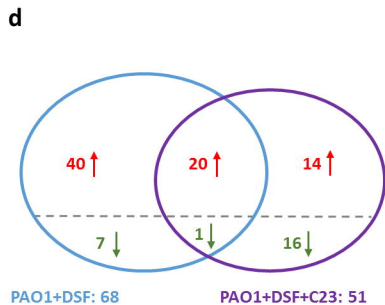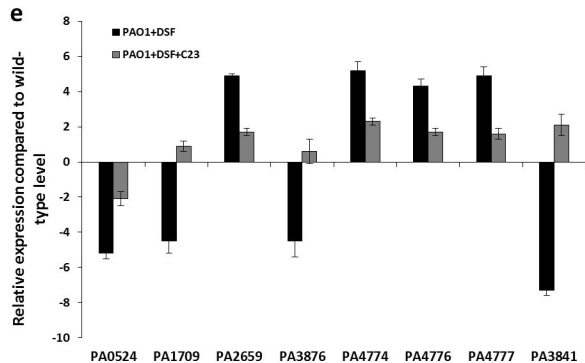



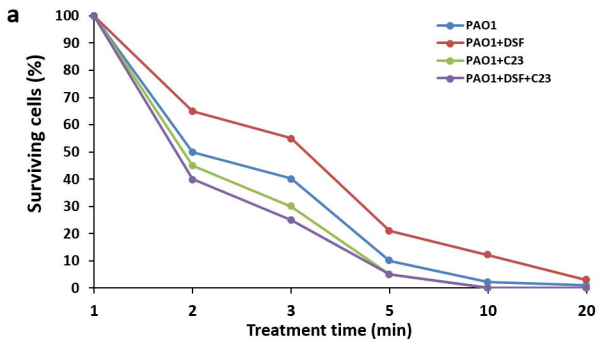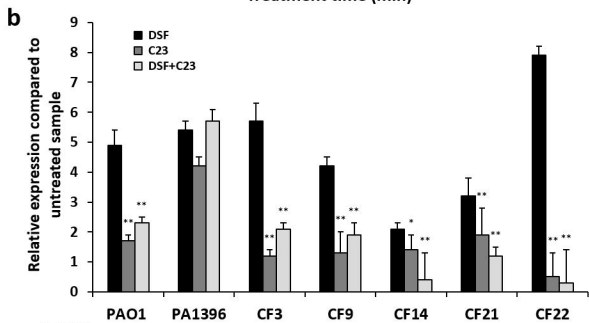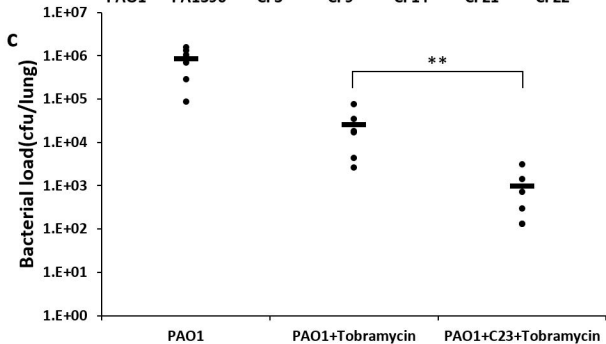

Source: https://www.biorxiv.org/content/10.1101/291260v1.full.pdf
